# Supplementary material for: A longitudinal study of independent scholar-published open access journals
Source: PeerJ. 2016 May 10;4:e1990. doi: 10.7717/peerj.1990 (PMC4867697; doi:10.7717/peerj.1990)
Supplement: Supplemental Information 2 — This data dictionary serves the purpose of guiding the external use of our primary datasets with an explaination of each data item. [file peerj-04-1990-s002.xlsx]

## Sheet: DATA DICTIONARY
Name	Column	Value	Description (*all the data was collected in 2015)
APC	A	YES/NO	The item represents if the journal charges APC or not (YES - it has APCs; NO - it does't charge or there is no APC information on the journal website). This information was checked during the second half of 2015.
2014-1987	B-AC	number	The number of peer-reviewed articles (or comparable "core content") published per journal over the time period between 1987 and 2014 is collected and arranged in the column AC - colume B. Data has been aggregated from previously published research and new data has been collected at several points in time with the latests being the second half of 2015 .Please see manuscript for methdology descript…
URL	AD	url address	The item contains the URL address of the journal website. If the original journal websit had disappeared, the url address for webiste on the Internet Archive was recorded instead.
Journal Start Year	AE	year	The item represents the year when the journal was founded.
OA Start Year	AF	year	The item represents the year when the journal became an open access journal. Since all of journals studied here were born OA, the year when they were founded are the same as the year when they became open access journals.
OA End Year	AG	year	The item represent the year when the journal stopped pubilshing open access while still continuing to publish. In other words this means that the journal converted to become a subscriptio-based journal.
Journal End Year	AH	year	The item represent the year when the journal became inactive.
Did it become a sub. Journal?	AI	YES/NO	The item labels a journal that has become subscription-based journal (YES - it has converted to subsciption model; NO - it has remained with OA model).
Title	AJ	text	The item represents the title of this journal.
Publisher	AK	text	The item is to record the pubilsher of the journal. Not always discernible or available. Data agreggated from DOAJ/SCOPUS/WoS/Previous research where available.
ISSN	AL	8 - digital code	The item represents the ISSN code assigned to a journal.
Subjects	AM	text	The item is to detemine specific subject fields that the journal can be seen as belonging to. The subject fields were further grouped into 9 broad disciplines that include Mathematics, Biomedicine, Chemistry, Engineering, Earth Science, Physics and Astronomy, Arts and Humanities, Business and Economics and Social Science.
DOAJ(ISSN-ISSN)	AN	YES/NO	The item represents if the journal is indexed by DOAJ or not (YES - it is included; NO - it couldn't be found).
SCOPUS (ISSN-ISSN)	AO	YES/NO	The item represents if the journal is indexed by SCOPUS or not (YES - it is included; NO - it couldn't be found).
